# Supplementary material for: What factors contribute to the self-reported oral health status of Arab adolescents? An assessment using a validated Arabic-WHO tool for child oral health (A-OHAT)
Source: Springer Nature journal article supplement (doi:10.1186/s12903-020-1018-8), 2020-01-28
Supplement: MOESM1 [file 17602974]

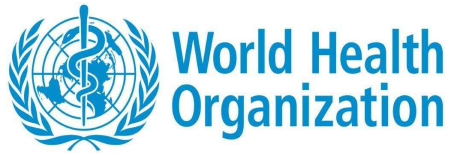

Annex 8

# **Oral Health Questionnaire for Children**

*First, we would like you to answer some questions concerning yourself and your teeth*

| Identification number                                                                                                                                                                                                                                                         | Sex | Location |  |  |                                      |                                       |                                        |                                            |                                        |
|-------------------------------------------------------------------------------------------------------------------------------------------------------------------------------------------------------------------------------------------------------------------------------|-----|----------|--|--|--------------------------------------|---------------------------------------|----------------------------------------|--------------------------------------------|----------------------------------------|
| 1. <table border="1" style="display: inline-table; vertical-align: middle;"><tr><td style="width: 20px; height: 20px;"></td><td style="width: 20px; height: 20px;"></td><td style="width: 20px; height: 20px;"></td><td style="width: 20px; height: 20px;"></td></tr></table> |     |          |  |  | Boy<br><input type="checkbox"/><br>1 | Girl<br><input type="checkbox"/><br>2 | Urban<br><input type="checkbox"/><br>1 | Periurban<br><input type="checkbox"/><br>2 | Rural<br><input type="checkbox"/><br>3 |
|                                                                                                                                                                                                                                                                               |     |          |  |  |                                      |                                       |                                        |                                            |                                        |

2. **How old are you today?** \_\_\_\_\_  
(Years)

3. **How would you describe the health of your teeth and gums?**  
(Read each item)

|                 | Teeth                      | Gums                       |
|-----------------|----------------------------|----------------------------|
| Excellent.....  | <input type="checkbox"/> 1 | <input type="checkbox"/> 1 |
| Very good.....  | <input type="checkbox"/> 2 | <input type="checkbox"/> 2 |
| Good.....       | <input type="checkbox"/> 3 | <input type="checkbox"/> 3 |
| Average .....   | <input type="checkbox"/> 4 | <input type="checkbox"/> 4 |
| Poor .....      | <input type="checkbox"/> 5 | <input type="checkbox"/> 5 |
| Very poor ..... | <input type="checkbox"/> 6 | <input type="checkbox"/> 6 |
| Don't know..... | <input type="checkbox"/> 9 | <input type="checkbox"/> 9 |

4. **How often during the past 12 months did you have toothache or feel discomfort due to your teeth?**

|                    |                            |
|--------------------|----------------------------|
| Often.....         | <input type="checkbox"/> 1 |
| Occasionally ..... | <input type="checkbox"/> 2 |
| Rarely .....       | <input type="checkbox"/> 3 |
| Never .....        | <input type="checkbox"/> 4 |
| Don't know.....    | <input type="checkbox"/> 9 |

---

*Now please answer some questions about the care of your teeth*

---

5. **How often did you go to the dentist during the past 12 months?**  
(Put a tick/cross in one only)

- Once .....  1  
Twice.....  2  
Three times.....  3  
Four times.....  4  
More than four times .....  5  
I had no visit to dentist during the past 12 months .....  6  
I have never received dental care/visited a dentist.....  7  
I don't know/don't remember .....  9
- 

*If you did not see a dentist during the last 12 months, go on to question 7*

---

6. **What was the reason for your last visit to the dentist?**  
(Put a tick/cross in one box only)

- Pain or trouble with teeth, gums or mouth.....  1  
Treatment/follow-up treatment .....  2  
Routine check-up of teeth/treatment .....  3  
I don't know/don't remember .....  9
- 

7. **How often do you clean your teeth?**  
(Put a tick/cross in one box only)

- Never .....  1  
Several times a month (2–3 times).....  2  
Once a week .....  3  
Several times a week (2–6 times).....  4  
Once a day .....  5  
2 or more times a day .....  6
-

8. **Do you use any of the following to clean your teeth or gums?**

(Read each item)

|                            | Yes<br>1                 | No<br>2                  |
|----------------------------|--------------------------|--------------------------|
| Toothbrush .....           | <input type="checkbox"/> | <input type="checkbox"/> |
| Wooden toothpicks.....     | <input type="checkbox"/> | <input type="checkbox"/> |
| Plastic toothpicks.....    | <input type="checkbox"/> | <input type="checkbox"/> |
| Thread (dental floss)..... | <input type="checkbox"/> | <input type="checkbox"/> |
| Charcoal .....             | <input type="checkbox"/> | <input type="checkbox"/> |
| Chewstick/miswak .....     | <input type="checkbox"/> | <input type="checkbox"/> |
| Other.....                 | <input type="checkbox"/> | <input type="checkbox"/> |

Please specify\_\_\_\_\_

9. a) **Do you use toothpaste to clean your teeth.....** Yes 1  No 2

b) **Do you use toothpaste that contains fluoride?.....** Yes 1  No 2

Don't know.....  9

10. **Because of the state of your teeth and mouth, have you experienced any of the following problems during the past year?**

|                                                                                                                       | Yes<br>1                 | No<br>2                  | Don't know<br>0          |
|-----------------------------------------------------------------------------------------------------------------------|--------------------------|--------------------------|--------------------------|
| (a) I am not satisfied with the appearance of my teeth....                                                            | <input type="checkbox"/> | <input type="checkbox"/> | <input type="checkbox"/> |
| (b) I often avoid smiling and laughing because of my teeth .....                                                      | <input type="checkbox"/> | <input type="checkbox"/> | <input type="checkbox"/> |
| (c) Other children make fun of my teeth.....                                                                          | <input type="checkbox"/> | <input type="checkbox"/> | <input type="checkbox"/> |
| (d) Toothache or discomfort caused by my teeth forced me to miss classes at school or miss school for whole days..... | <input type="checkbox"/> | <input type="checkbox"/> | <input type="checkbox"/> |
| (e) I have difficulty biting hard foods.....                                                                          | <input type="checkbox"/> | <input type="checkbox"/> | <input type="checkbox"/> |
| (f) I have difficulty in chewing .....                                                                                | <input type="checkbox"/> | <input type="checkbox"/> | <input type="checkbox"/> |



---

13. **What level of education has your father completed (or your stepfather, guardian or other male adult living with you)?**

- No formal schooling.....  1
- Less than primary school .....  2
- Primary school completed.....  3
- Secondary school completed.....  4
- High school completed .....  5
- College/university completed .....  6
- No male adult in household .....  7
- Don't know .....  9

14. **What level of education has your mother completed?**

- No formal schooling.....  1
- Less than primary school .....  2
- Primary school completed.....  3
- Secondary school completed.....  4
- High school completed .....  5
- College/university completed .....  6
- No female adult in household .....  7
- Don't know .....  9

**(Insert country-specific categories)**

---

*That completes our questionnaire*

*Thank you very much for your cooperation!*

---

Year    Month    Day

|  |  |  |  |  |  |
|--|--|--|--|--|--|
|  |  |  |  |  |  |
|--|--|--|--|--|--|

Interviewer

|  |  |
|--|--|
|  |  |
|--|--|

District

|  |  |
|--|--|
|  |  |
|--|--|

Country

|  |  |  |  |  |  |
|--|--|--|--|--|--|
|  |  |  |  |  |  |
|--|--|--|--|--|--|
