# Supplementary material for: What factors contribute to the self-reported oral health status of Arab adolescents? An assessment using a validated Arabic-WHO tool for child oral health (A-OHAT)
Source: Springer Nature journal article supplement (doi:10.1186/s12903-020-1018-8), 2020-01-28
Supplement: MOESM2 [file 17602974]

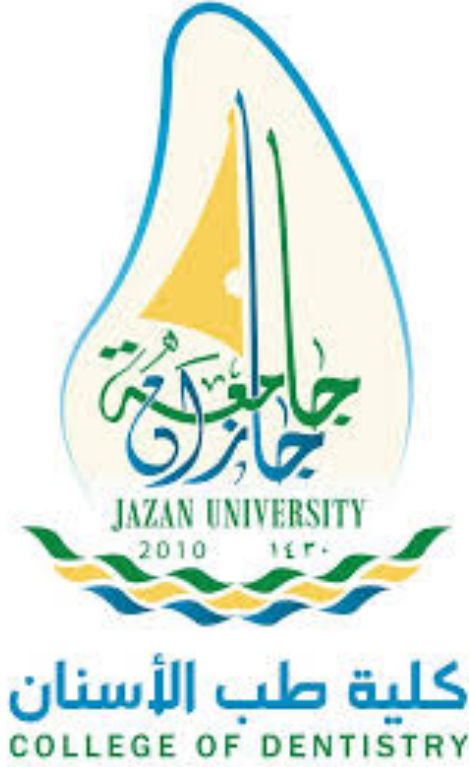

# استبيان منظمة الصحة العالمية (WHO) لمعاينة صحة الفم والأسنان

كلية طب الأسنان - جامعة جازان

اختر الإجابة الصحيحة التي تعبر عن نفسك وعن حالة أسنانك الصحية:

(1) مدينة السكن الحالية: \_\_\_\_\_

(2) الجنس <sub>1</sub> ذكر <sub>2</sub> أنثى

(3) كم عمرك اليوم؟  شهر  سنة

(4) كم عدد الأسنان الطبيعية التي تمتلكها؟

- <sub>1</sub> لا توجد لدي أي أسنان طبيعية .....
- <sub>2</sub> 9-1 أسنان .....
- <sub>3</sub> 19-10 سن .....
- <sub>4</sub> 20 سن أو أكثر .....

(5) كيف تصف الحالة الصحية لأسنانك ولثتك؟

- | اللثة                                 | الأسنان                               |                 |
|---------------------------------------|---------------------------------------|-----------------|
| <input type="checkbox"/> <sub>1</sub> | <input type="checkbox"/> <sub>1</sub> | ممتازة .....    |
| <input type="checkbox"/> <sub>2</sub> | <input type="checkbox"/> <sub>2</sub> | جيدة جداً ..... |
| <input type="checkbox"/> <sub>3</sub> | <input type="checkbox"/> <sub>3</sub> | جيدة .....      |
| <input type="checkbox"/> <sub>4</sub> | <input type="checkbox"/> <sub>4</sub> | متوسطة .....    |
| <input type="checkbox"/> <sub>5</sub> | <input type="checkbox"/> <sub>5</sub> | سيئة .....      |
| <input type="checkbox"/> <sub>6</sub> | <input type="checkbox"/> <sub>6</sub> | سيئة جداً ..... |
| <input type="checkbox"/> <sub>7</sub> | <input type="checkbox"/> <sub>7</sub> | لا أعلم .....   |

6) خلال الـ ١٢ شهراً، هل حدث وأن آلمتك أسنانك أو شعرت بشيء من عدم الراحة بسببها؟  
(اقرأ كل الاختيارات)

- 1 غالباً .....
- 2 من حين إلى آخر .....
- 3 نادراً .....
- 4 أبداً لم يحدث .....
- 5 لا أعلم .....

الآن رجاءً أجب على بعض الأسئلة التي تتعلق بصحة أسنانك

7) كم مرة ذهبت إلى طبيب الأسنان خلال الـ ١٢ شهراً الماضية؟  
(اختر إجابة واحدة/ ضع علامة X على الإجابة الصحيحة)

- 1 مرة واحدة .....
- 2 مرتان .....
- 3 ثلاثة مرات .....
- 4 أربعة مرات .....
- 5 أكثر من أربعة مرات .....
- 6 لم أذهب ولا مرة لزيارة طبيب الأسنان خلال الـ ١٢ شهراً الماضية .....
- 7 لا أعلم / لا أتذكر .....

إذا لم تذهب إلى طبيب الأسنان بتاتاً خلال الـ ١٢ شهراً الماضية، اذهب إلى السؤال رقم (9)

(8) ما السبب في زيارتك الأخيرة لطبيب الأسنان؟  
(اختر إجابة واحدة/ ضع علامة X على الإجابة الصحيحة)

- 1 ألم أو مشكلة في الأسنان، اللثة أو الفم .....
- 2 علاج أو مراجعة ما بعد العلاج .....
- 3 كشف عام شامل .....
- 4 لا أعلم / لا أتذكر .....

(9) كم مرة تنظف فيها أسنانك عادة؟  
(اختر إجابة واحدة/ ضع علامة X على الإجابة الصحيحة)

- 1 أبداً .....
- 2 بعض الأحيان شهرياً (2-3 مرات) .....
- 3 مرة في الأسبوع .....
- 4 عدة مرات أسبوعياً (2-6 مرات) .....
- 5 مرة واحدة في اليوم .....
- 6 مرتان أو أكثر يومياً .....

10 ( هل تستخدم أياً من المواد التالية لتنظيف أسنانك أو لثتك؟  
(اختر إجابة أو أكثر حسب ما يناسب حالتك)

- 1 ..... فرشاة الأسنان
- 2 ..... عود (خلال او نكاش) الأسنان الخشبي
- 3 ..... عود (خلال او نكاش) الأسنان البلاستيك
- 4 ..... خيط الأسنان
- 5 ..... الفحم
- 6 ..... المسواك
- 7 ..... أخرى

الرجاء التوضيح: \_\_\_\_\_

11 ( هل تستخدم معجون الأسنان عند تنظيف أسنانك؟

- 1 ..... نعم
- 2 ..... لا

12 ( هل تستخدم معجون أسنان يحتوي على مادة الفلورايد؟

- 1 ..... نعم
- 2 ..... لا
- 3 ..... لا أعلم

3 1) بسبب حالة أسنانك وفمك الصحية، هل صادفتك أي مشكلة من المشاكل التالية خلال السنة الماضية؟

نعم (1)  
لا (2)  
لا أعلم (0)

(a) لم أكن راضياً عن المظهر الخارجي لأسناني .....

(b) غالباً أتجنب الابتسام والضحك بسبب مظهر أسناني .....

(c) الآخرون يسخرون من مظهر أسناني .....

(d) يوجد ألم أو عدم ارتياح بسبب أسناني

مما أجبرني على التغيب عن الحصص

أو المدرسة ليوم كامل .....

(e) أجد صعوبة في العض على الأكل القاسي .....

(f) أجد صعوبة في المضغ .....

4 1) كم عادة تأكل أو تشرب أيّاً من المأكولات أو المشروبات التالية، وإن كانت بكميات قليلة؟

| أبداً<br>(1) | عدة مرات<br>في الشهر<br>(2) | مرة في<br>الأسبوع<br>(3) | عدة مرات<br>في الأسبوع<br>(4) | كل يوم<br>(5) | عدة مرات<br>في اليوم<br>(6) |
|--------------|-----------------------------|--------------------------|-------------------------------|---------------|-----------------------------|
|--------------|-----------------------------|--------------------------|-------------------------------|---------------|-----------------------------|

|                          |                          |                          |                          |                          |                          |
|--------------------------|--------------------------|--------------------------|--------------------------|--------------------------|--------------------------|
| <input type="checkbox"/> | <input type="checkbox"/> | <input type="checkbox"/> | <input type="checkbox"/> | <input type="checkbox"/> | <input type="checkbox"/> |
|--------------------------|--------------------------|--------------------------|--------------------------|--------------------------|--------------------------|

(a) فواكه طازجة .....

|                          |                          |                          |                          |                          |                          |
|--------------------------|--------------------------|--------------------------|--------------------------|--------------------------|--------------------------|
| <input type="checkbox"/> | <input type="checkbox"/> | <input type="checkbox"/> | <input type="checkbox"/> | <input type="checkbox"/> | <input type="checkbox"/> |
|--------------------------|--------------------------|--------------------------|--------------------------|--------------------------|--------------------------|

(b) بسكويت، كعك، فطائر محلاه .....

|                          |                          |                          |                          |                          |                          |
|--------------------------|--------------------------|--------------------------|--------------------------|--------------------------|--------------------------|
| <input type="checkbox"/> | <input type="checkbox"/> | <input type="checkbox"/> | <input type="checkbox"/> | <input type="checkbox"/> | <input type="checkbox"/> |
|--------------------------|--------------------------|--------------------------|--------------------------|--------------------------|--------------------------|

(c) عصيرات، مشروبات غازية .....

|                          |                          |                          |                          |                          |                          |
|--------------------------|--------------------------|--------------------------|--------------------------|--------------------------|--------------------------|
| <input type="checkbox"/> | <input type="checkbox"/> | <input type="checkbox"/> | <input type="checkbox"/> | <input type="checkbox"/> | <input type="checkbox"/> |
|--------------------------|--------------------------|--------------------------|--------------------------|--------------------------|--------------------------|

(d) عسل أو مربى .....

|                          |                          |                          |                          |                          |                          |
|--------------------------|--------------------------|--------------------------|--------------------------|--------------------------|--------------------------|
| <input type="checkbox"/> | <input type="checkbox"/> | <input type="checkbox"/> | <input type="checkbox"/> | <input type="checkbox"/> | <input type="checkbox"/> |
|--------------------------|--------------------------|--------------------------|--------------------------|--------------------------|--------------------------|

(e) علكة تحتوي على السكر .....

|                          |                          |                          |                          |                          |                          |
|--------------------------|--------------------------|--------------------------|--------------------------|--------------------------|--------------------------|
| <input type="checkbox"/> | <input type="checkbox"/> | <input type="checkbox"/> | <input type="checkbox"/> | <input type="checkbox"/> | <input type="checkbox"/> |
|--------------------------|--------------------------|--------------------------|--------------------------|--------------------------|--------------------------|

(f) حلويات وسكاكر .....

|                          |                          |                          |                          |                          |                          |
|--------------------------|--------------------------|--------------------------|--------------------------|--------------------------|--------------------------|
| <input type="checkbox"/> | <input type="checkbox"/> | <input type="checkbox"/> | <input type="checkbox"/> | <input type="checkbox"/> | <input type="checkbox"/> |
|--------------------------|--------------------------|--------------------------|--------------------------|--------------------------|--------------------------|

(g) حليب محلى بالسكر .....

|                          |                          |                          |                          |                          |                          |
|--------------------------|--------------------------|--------------------------|--------------------------|--------------------------|--------------------------|
| <input type="checkbox"/> | <input type="checkbox"/> | <input type="checkbox"/> | <input type="checkbox"/> | <input type="checkbox"/> | <input type="checkbox"/> |
|--------------------------|--------------------------|--------------------------|--------------------------|--------------------------|--------------------------|

(h) شاي محلى بالسكر .....

|                          |                          |                          |                          |                          |                          |
|--------------------------|--------------------------|--------------------------|--------------------------|--------------------------|--------------------------|
| <input type="checkbox"/> | <input type="checkbox"/> | <input type="checkbox"/> | <input type="checkbox"/> | <input type="checkbox"/> | <input type="checkbox"/> |
|--------------------------|--------------------------|--------------------------|--------------------------|--------------------------|--------------------------|

(i) قهوة محلاة بالسكر .....

| إطلاقاً                  | نادراً ما                | عدة مرات في الشهر        | مرة في الأسبوع           | عدة مرات في الأسبوع      | كل يوم                   |
|--------------------------|--------------------------|--------------------------|--------------------------|--------------------------|--------------------------|
| (1)                      | (2)                      | (3)                      | (4)                      | (5)                      | (6)                      |
| <input type="checkbox"/> | <input type="checkbox"/> | <input type="checkbox"/> | <input type="checkbox"/> | <input type="checkbox"/> | <input type="checkbox"/> |
| <input type="checkbox"/> | <input type="checkbox"/> | <input type="checkbox"/> | <input type="checkbox"/> | <input type="checkbox"/> | <input type="checkbox"/> |

15 ( 1 كم مرة عادة تستخدم أيّاً من أنواع التبغ التالية؟

السجائر، الشيشة/المعسل، السيجار .....

التبغ المضغى مثل: الشمة، التنبول .....

16 ( 1 ما هو المستوى العلمي الذي حصل عليه والدك (في حال عدم وجوده: الوصي الشرعي مثل العم أو الخال أو زوج الأم)؟

- 1 ..... لا تعليم رسمي
- 2 ..... أقل من المرحلة الابتدائية
- 3 ..... المرحلة الابتدائية
- 4 ..... المرحلة المتوسطة
- 5 ..... المرحلة الثانوية
- 6 ..... المرحلة الجامعية/كلية
- 7 ..... لا يوجد ولي أمر (ذكر) بالمنزل
- 8 ..... لا أعلم



17) ما هو المستوى العلمي الذي حصلت عليه والدتك (الأم)؟

- 1 ..... لا تعليم رسمي
- 2 ..... أقل من المرحلة الابتدائية
- 3 ..... المرحلة الابتدائية
- 4 ..... المرحلة المتوسطة
- 5 ..... المرحلة الثانوية
- 6 ..... المرحلة الجامعية/كلية
- 7 ..... لا توجد أنثى مربية بالمنزل
- 8 ..... لا أعلم

---

انتهت الأسئلة ... شكراً لتعاونكم
